# Supplementary material for: Evolutionary Time-Scale of the Begomoviruses: Evidence from Integrated Sequences in the Nicotiana Genome
Source: PLoS One. 2011 May 16;6(5):e19193. doi: 10.1371/journal.pone.0019193 (PMC3095596; doi:10.1371/journal.pone.0019193)
Supplement: Table S1 — Begomovirus accession numbers and descriptions. (XLS) [file pone.0019193.s002.xls]

## Sheet: Sheet1
		Supplementary Table 1: Begomovirus accession numbers and descriptions
		Accession number	Virus name	Country of origin	Old word / New World
		AF239671	Rhynchosia golden mosaic virus	Honduras	NW
		AY044133	Macroptilium mosaic Puerto Rico virus	Puerto Rico	NW
		AY339619	Tomato chino La Paz virus	Mexico	NW
		AY508993	Tomato yellow margin leaf curl virus	Venezuela	NW
		EF121755	Boerhavia yellow spot virus	Mexico	NW
		EF459696	Tomato yellow vein streak virus	Brazil	NW
		EF645647	Macroptilium golden mosaic virus	Jamaica	NW
		EU710752	Tomato mild mosaic virus	Brazil	NW
		FJ222587	Tobacco yellow crinkle virus	Cuba	NW
		FJ665283	Bean golden mosaic virus	Brazil	NW
		U51137	Abutilon mosaic virus-HW	Hawaï	NW
		AF189018	Tomato yellow leaf curl Indonesia virus	Indonesia	OW
		AF274349	Tomato leaf curl Sri Lanka virus	Sri Lanka	OW
		AF314145	Mungbean yellow mosaic India virus	Bangladesh	OW
		AJ489258	Tomato yellow leaf curl virus	Spain	OW
		AJ558121	Euphorbia leaf curl virus	China	OW
		AJ717580	East African cassava mosaic Kenya virus	Kenya	OW
		AJ865339	Tomato leaf curl Madagascar virus	Madagascar	OW
		AJ876550	Senecio yellow mosaic virus	China	OW
		AJ971263	Malvastrum leaf curl virus	China	OW
		AJ971267	Tobacco leaf curl Yunnan virus	China	OW
		AM182232	Vernonia yellow vein virus	India	OW
		AM236756	Malvastrum yellow mosaic virus	China	OW
		AM701760	Tobacco leaf curl Comoros virus	Comoros	OW
		AM701765	Tomato leaf curl Diana virus	Madagascar	OW
		AM701768	Tomato leaf curl Toliara virus	Madagascar	OW
		AY036009	Hollyhock leaf crumple virus	Egypt	OW
		AY044137	Tomato leaf curl Sudan virus	Sudan	OW
		AY184487	Squash leaf curl China virus	India	OW
		AY234383	Tomato leaf curl Gujarat virus	Nepal	OW
		AY269991	Mungbean yellow mosaic virus	Pakistan	OW
		AY502936	Tomato leaf curl Mali virus	Mali	OW
		DQ519575	Tomato leaf curl Arusha virus	Tanzania	OW
		DQ641690	Kudzu mosaic virus	Viet Nam	OW
		DQ641692	Clerodendrum golden mosaic virus	Viet Nam	OW
		DQ641694	Spilanthes yellow vein virus	Viet Nam	OW
		DQ641695	Mimosa yellow leaf curl virus	Viet Nam	OW
		DQ641696	Sida yellow vein Vietnam virus	Viet Nam	OW
		DQ641698	Erectites yellow mosaic virus	Viet Nam	OW
		DQ641699	Ludwigia yellow vein Vietnam virus	Viet Nam	OW
		DQ641701	Lindernia anagallis yellow vein virus	Viet Nam	OW
		DQ641702	Tomato yellow leaf curl Kanchanaburi virus	Viet Nam	OW
		DQ641707	Sida leaf curl virus	Viet Nam	OW
		DQ845787	Tomato yellow leaf curl Sardinia virus-Israel	Israel	OW
		EF456741	Sweet potato leaf curl Spain virus	Spain	OW
		EU366903	Kenaf leaf curl virus	India	OW
		EU384570	Cotton leaf curl Burewala virus	Pakistan	OW
		EU596959	Ramie mosaic virus	China	OW
		EU847740	Tomato yellow leaf curl Mali virus	Ghana	OW
		EU910141	Tomato leaf curl Kerala virus	India	OW
		FJ455449	Sunn hemp leaf distortion virus	India	OW
		FM210277	Tomato leaf curl virus	Cameroon	OW
		FM876851	Pepper yellow vein Mali virus	Burkina Faso	OW
		S53251	Tomato leaf curl virus	Australia	OW
		X76319	Tomato yellow leaf curl virus-Mild	Israel	OW
		Z24758	Indian cassava mosaic virus	India	OW
